# Supplementary material for: Nasal Administration of Lipopolysaccharide Exacerbates Allergic Rhinitis through Th2 Cytokine Production from Mast Cells
Source: MDPI journal article supplement (doi:10.3390/allergies1040020), 2021-11-11
Supplement: s1 [file s1]

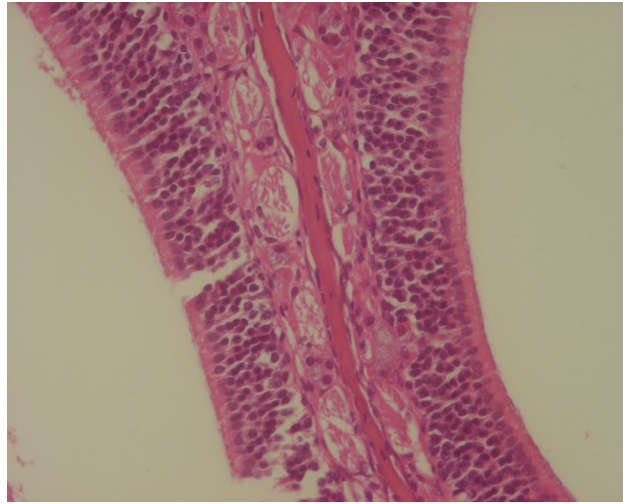

X 400

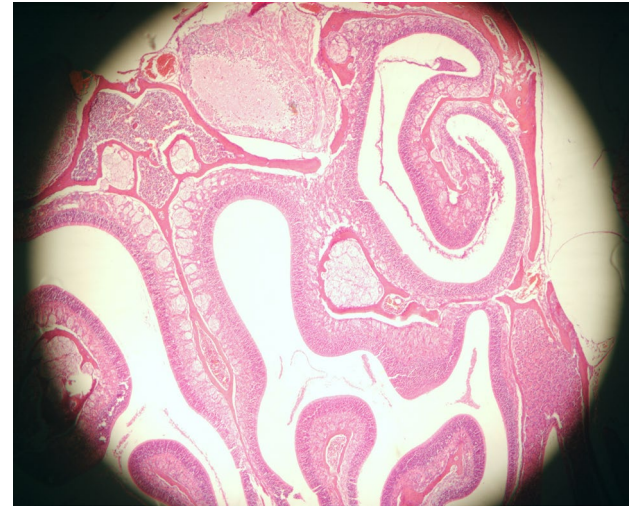

X 40

**Figure S1.** H&E stain of coronal section of head of mice, intranasal administrated with 4  $\mu$ g LPS for 7 days.
